# Supplementary material for: Three-dimensional assemblies of carbon nitride tubes as nanoreactors for enhanced photocatalytic hydrogen production
Source: Royal Society of Chemistry journal article supplement (doi:10.1039/c9ta10688j), 2019-11-25
Supplement: c9ta10688j1.pdf [file c9ta10688j1.pdf]

## Supporting Information

# Three-dimensional Assembly of Carbon Nitride Tubes as Nanoreactors for Enhanced Photocatalytic Hydrogen Production

Chen Zhao<sup>a</sup>, Qi Li<sup>a</sup>, Ying Xie<sup>a</sup>, Liping Zhang<sup>c</sup>, Xudong Xiao<sup>a</sup>, Dan Wang<sup>a</sup>, Yanqing Jiao<sup>a</sup>, Cameron Alexander Hurd Price<sup>b,d</sup>, Baojiang Jiang<sup>\*a</sup>, and Jian Liu<sup>\*b,d</sup>

<sup>a</sup> C. Zhao, Q. Li, Prof. Y. Xie, X. D. Xiao, D. Wang, Dr. Y. Q. Jiao, Prof. B. J. Jiang

Key Laboratory of Functional Inorganic Material Chemistry, Ministry of Education of the People's Republic of China, School of Chemistry and Materials Science, Heilongjiang University, Harbin 150080, China.

<sup>b</sup> C. A. H. Price, Prof. J. Liu

State Key Laboratory of Catalysis, Dalian Institute of Chemical Physics, Chinese Academy of Sciences, 457 Zhongshan Road, Dalian 116023, China

<sup>c</sup> Dr. L.P. Zhang

Department of Chemistry and Biochemistry, Kent State University, Kent, OH 44242, USA

<sup>d</sup> C. A. H. Price, Prof. J. Liu

DICP-Surrey Joint Centre for Future Materials, Department of Chemical and Process Engineering, University of Surrey, Guildford, Surrey, UK

E-mail: jbj@hlju.edu.cn; jian.liu@surrey.ac.uk

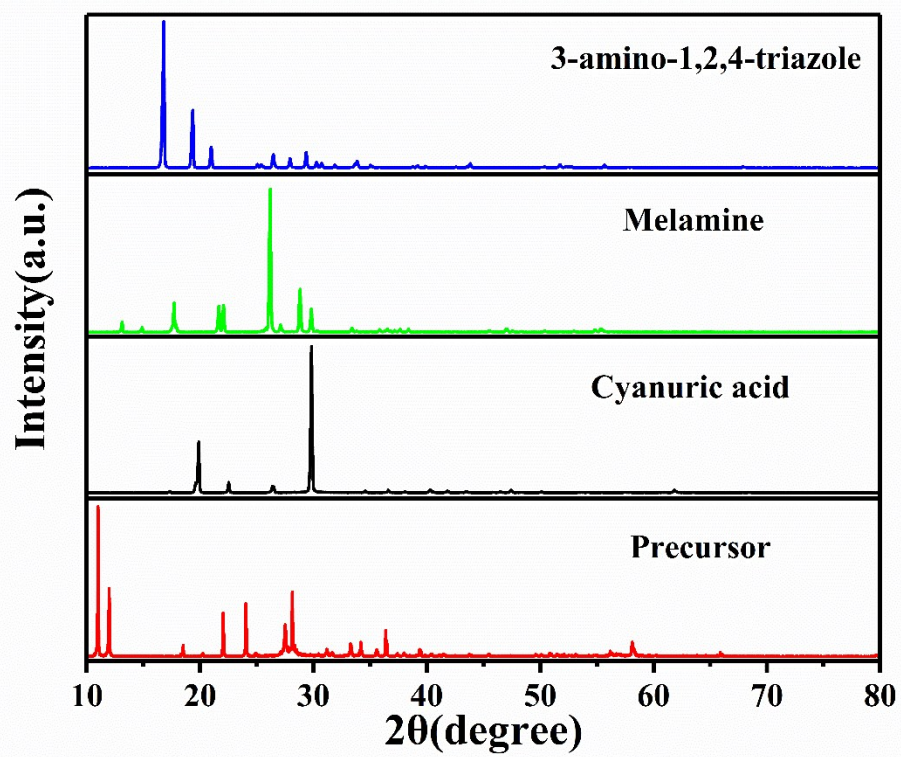

**Figure S1.** XRD pattern of precursor (red line), commercial cyanuric acid (black line), commercial melamine (green line) and commercial 3-amino-1,2,4-triazole (blue line).

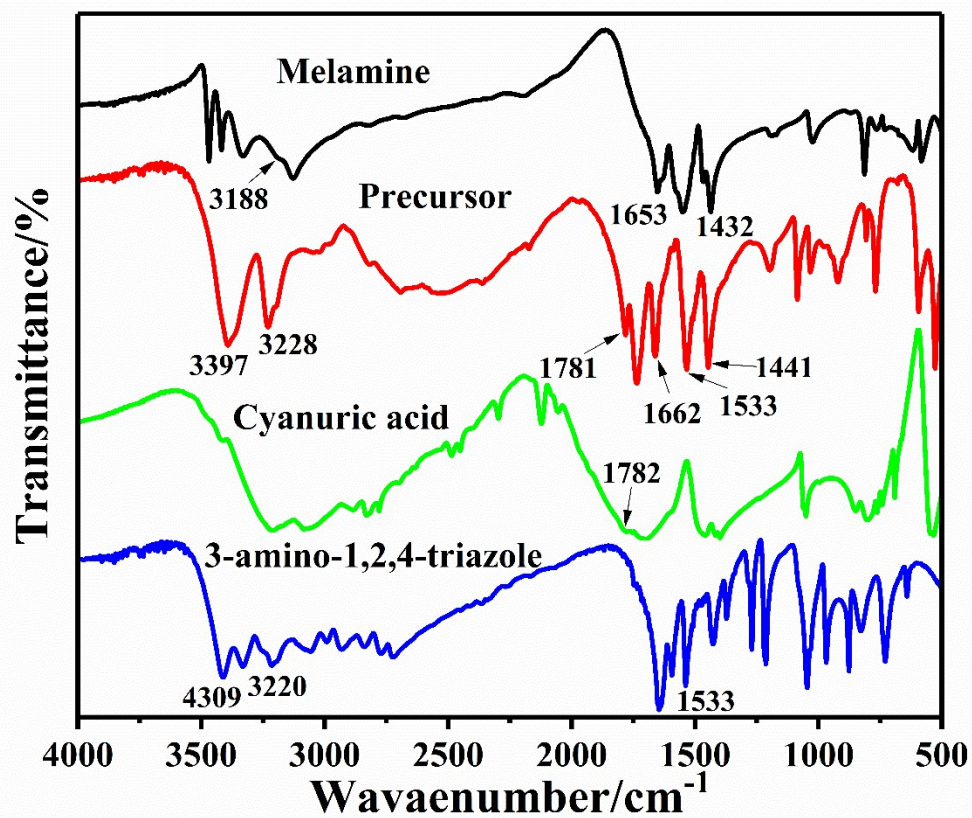

**Figure S2.** The FT-IR spectra of commercial melamine (black line), the precursor (red line), commercial cyanuric acid (green line) and commercial 3-amino-1,2,4-triazole (AT, blue line).

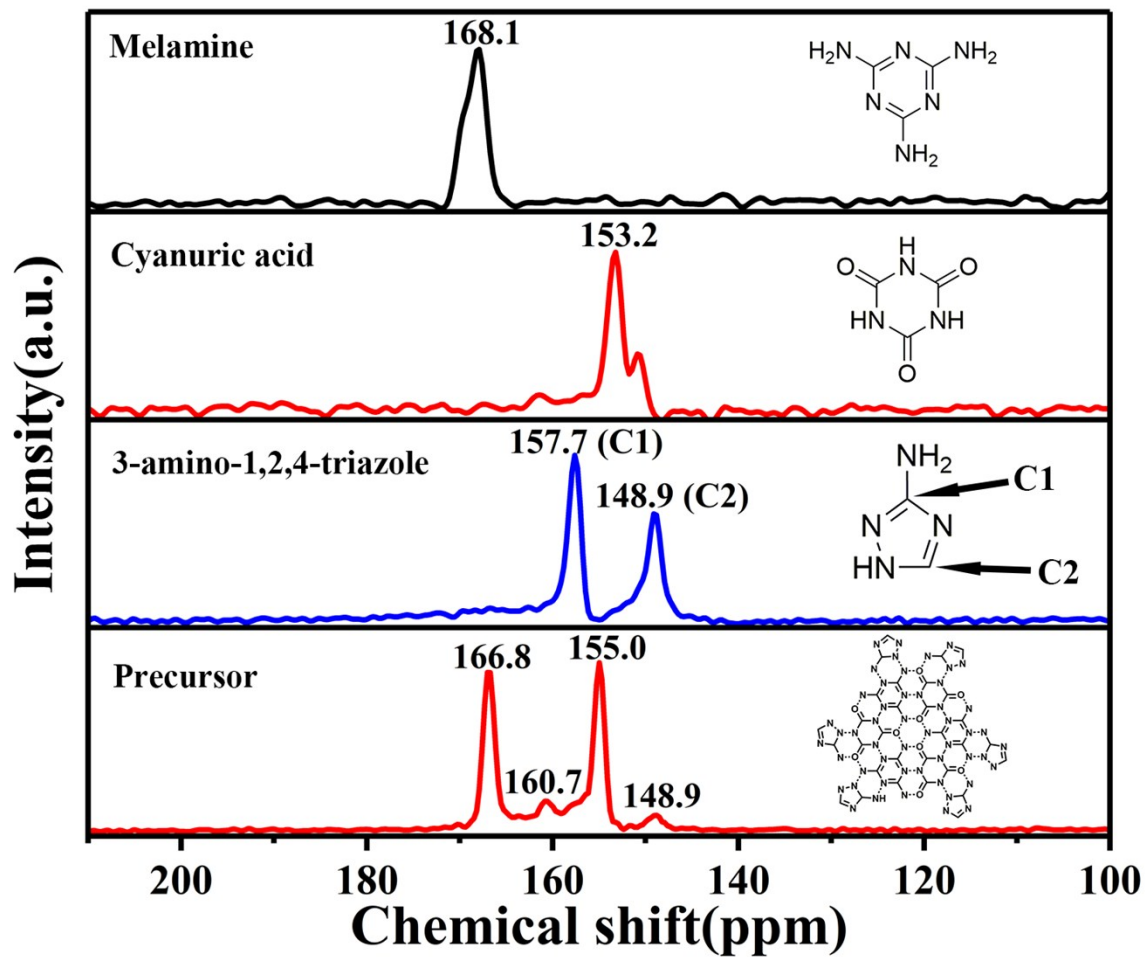

**Figure S3.** Solid-state  $^{13}\text{C}$  MAS NMR spectra of melamine, cyanuric acid 3-amino-1, 2, 4-triazole and precursor.

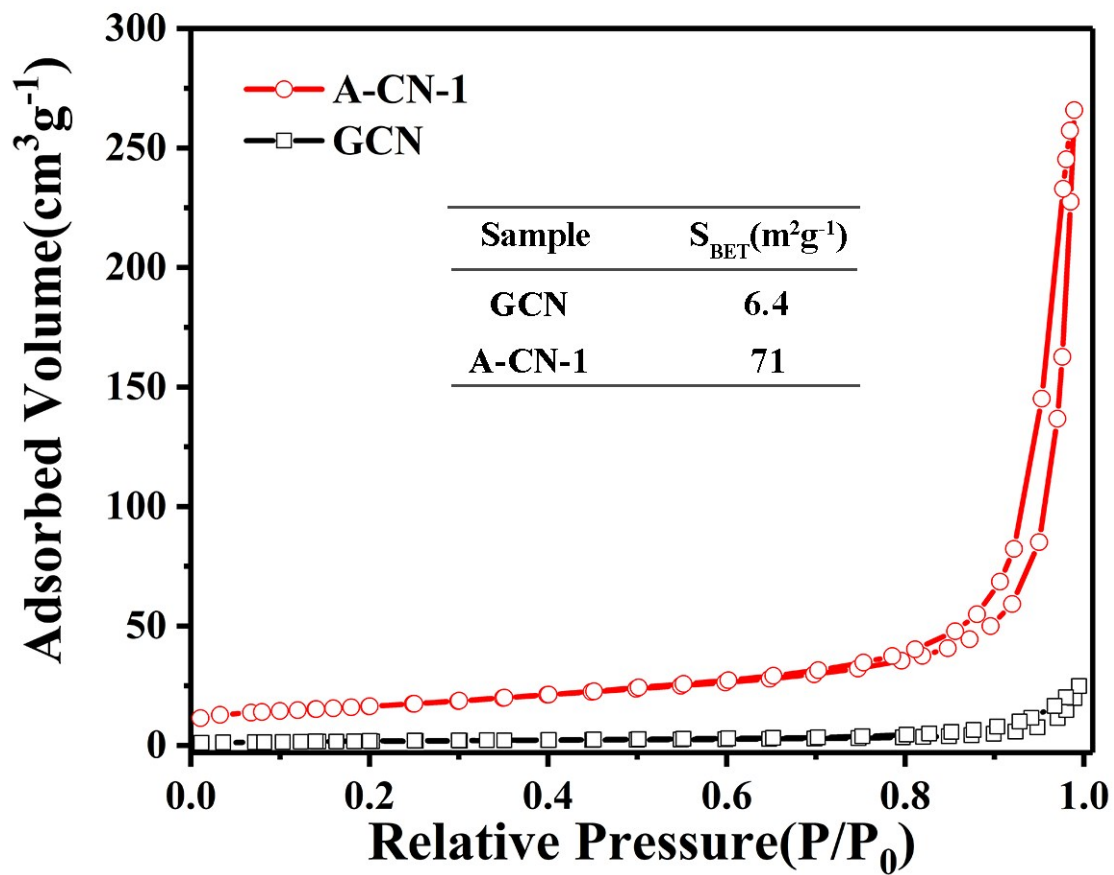

Figure S4. N<sub>2</sub>-sorption isotherms of GCN and A-CN-1.

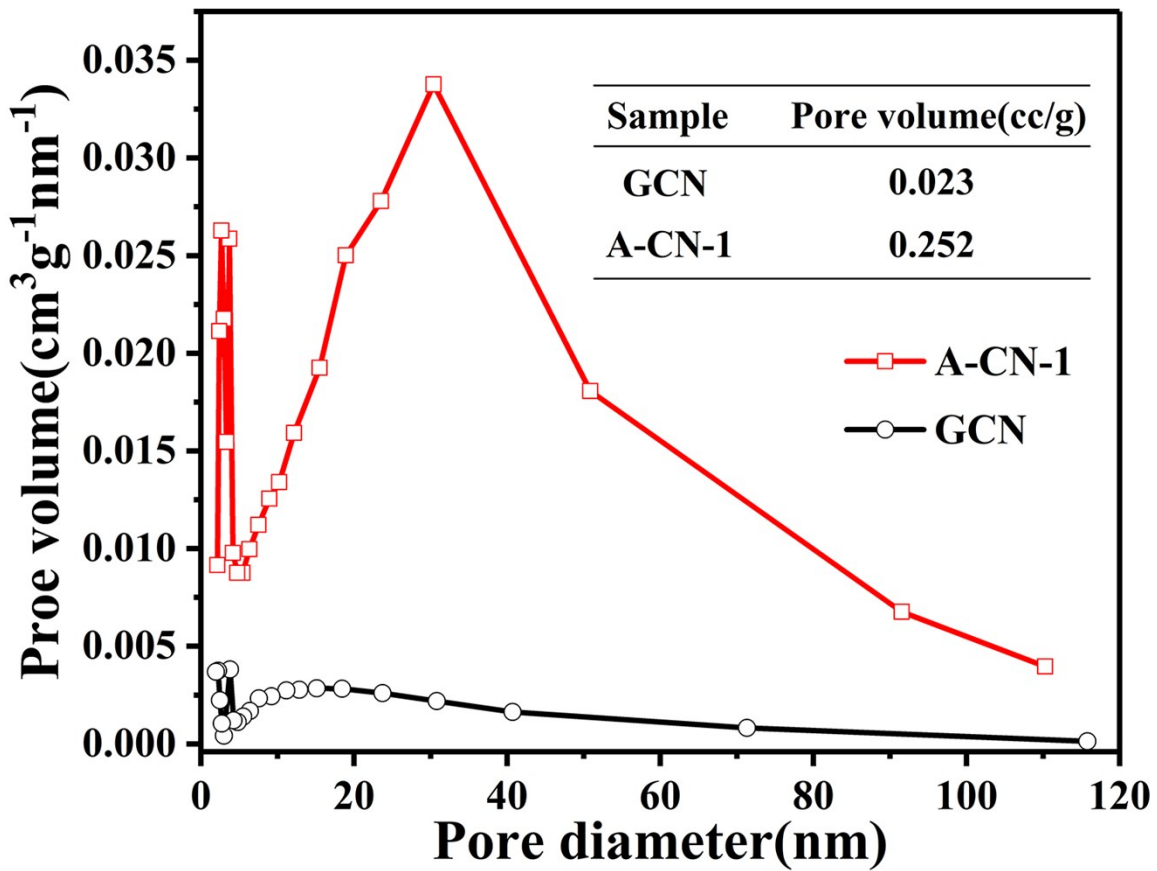

Figure S5. The pore size distribution of GCN and A-CN-1.

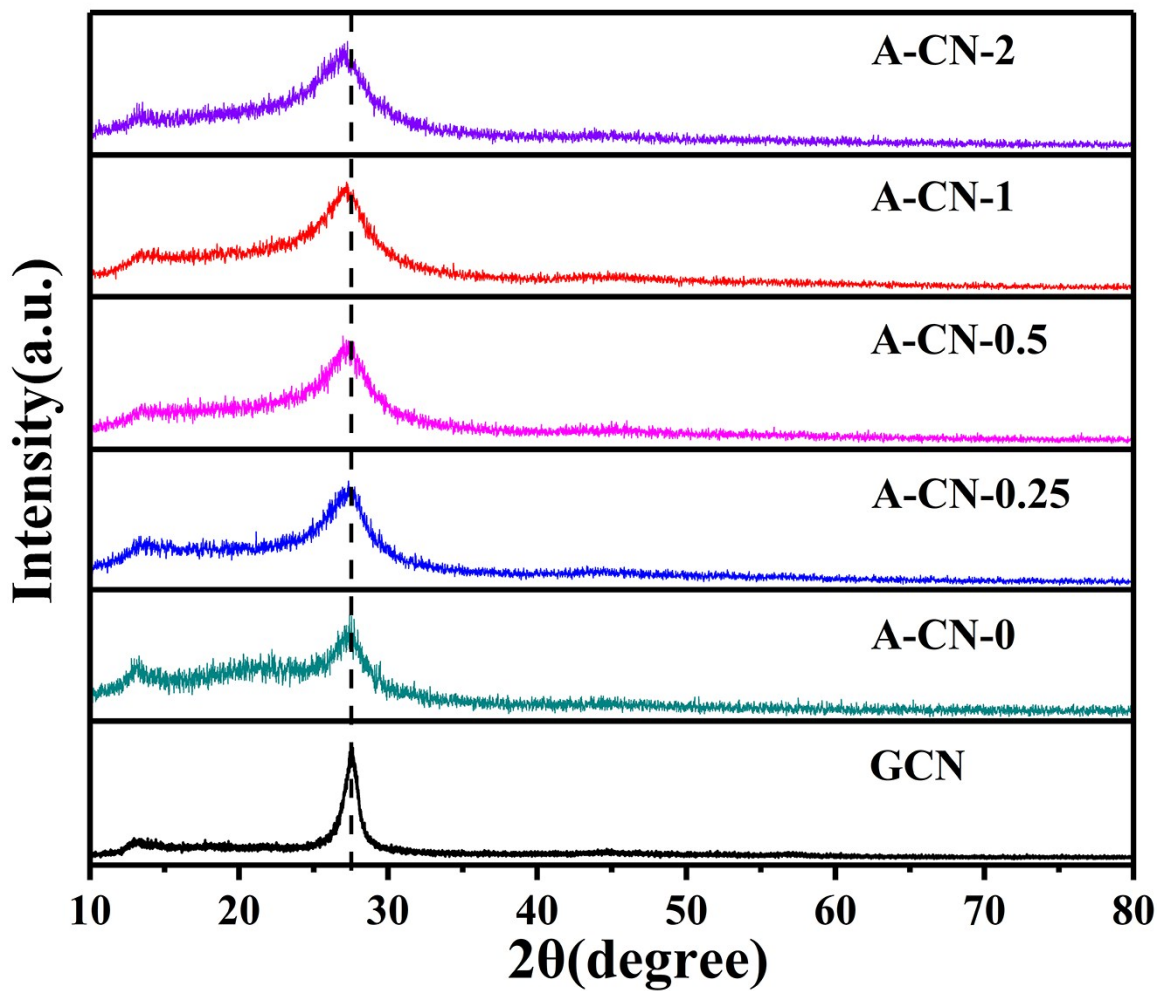

**Figure S6.** XRD pattern of serials of products with different proportions 3-amino-1, 2, 4-triazole and reference sample GCN.

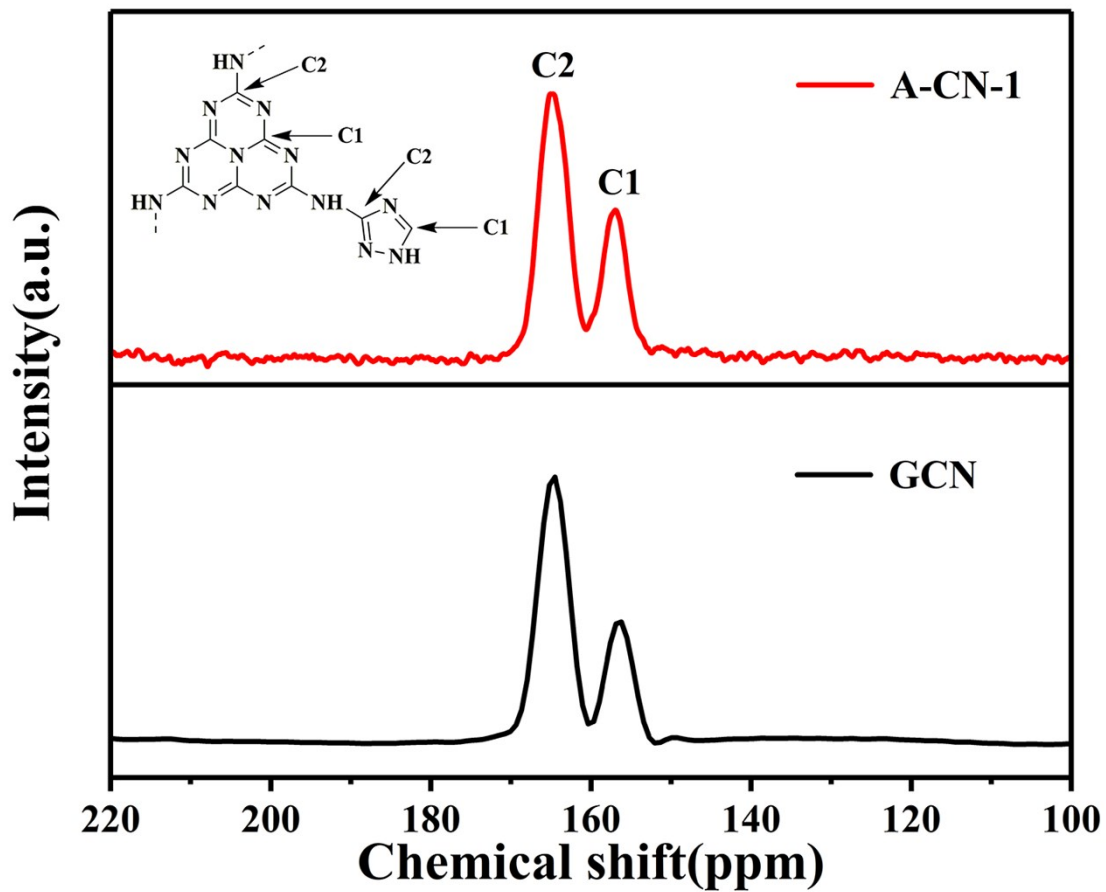

Figure S7. Solid-state  $^{13}\text{C}$  MAS NMR spectra of GCN and A-CN-1.



**Table S1.** XPS analysis of GCN and A-CN-1

| <b>Sample</b> | <b>C (Atom conc%)</b> | <b>N (Atom conc%)</b> | <b>P (Atom conc%)</b> | <b>N/C</b> |
|---------------|-----------------------|-----------------------|-----------------------|------------|
| GCN           | 41.12                 | 55.46                 | 0                     | 1.35       |
| A-CN-1        | 40.45                 | 58.88                 | 0                     | 1.46       |

**Table S2.** Organic elemental analysis of GCN and A-CN-1.

| <b>Sample</b> | <b>C (wt%)</b> | <b>N (wt%)</b> | <b>N/C</b> |
|---------------|----------------|----------------|------------|
| GCN           | 35.12          | 56.34          | 1.38       |
| A-CN-1        | 34.11          | 58.98          | 1.48       |

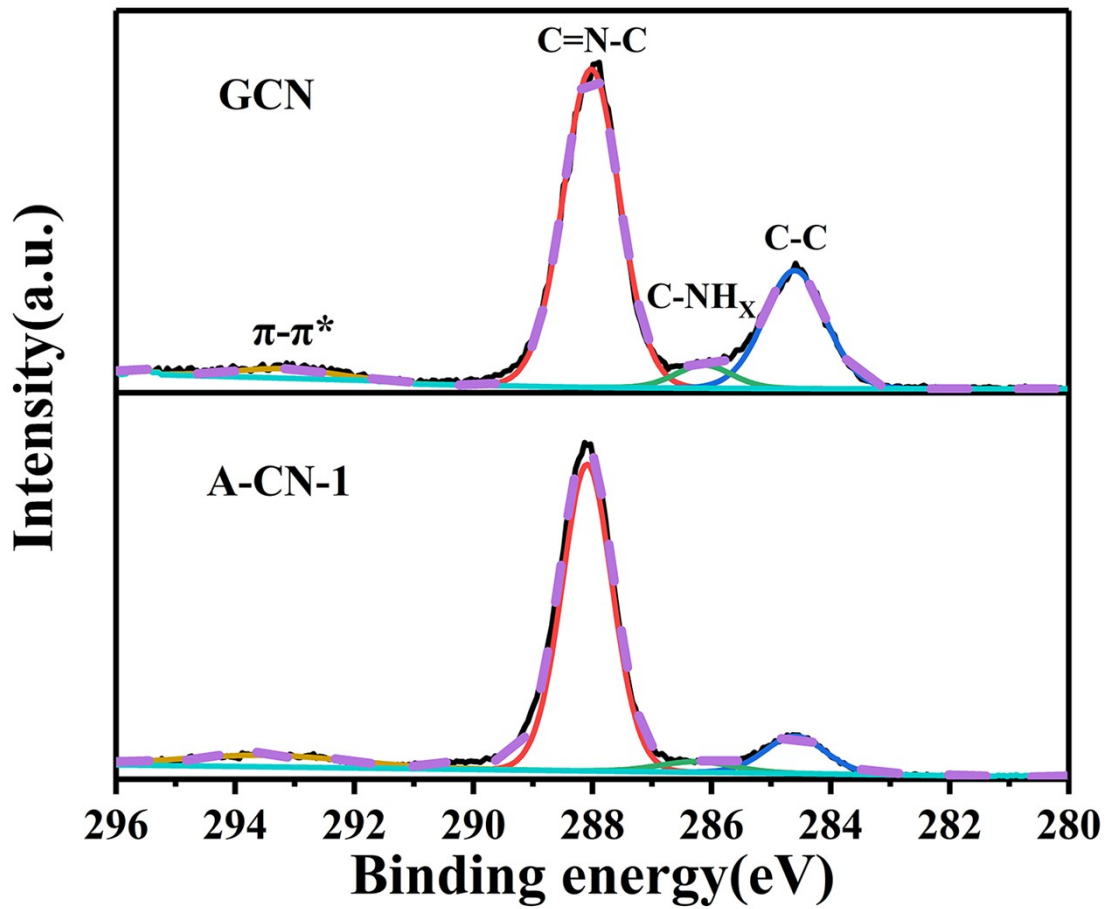

Figure S8. C 1s XPS spectra of GCN and A-CN-1.

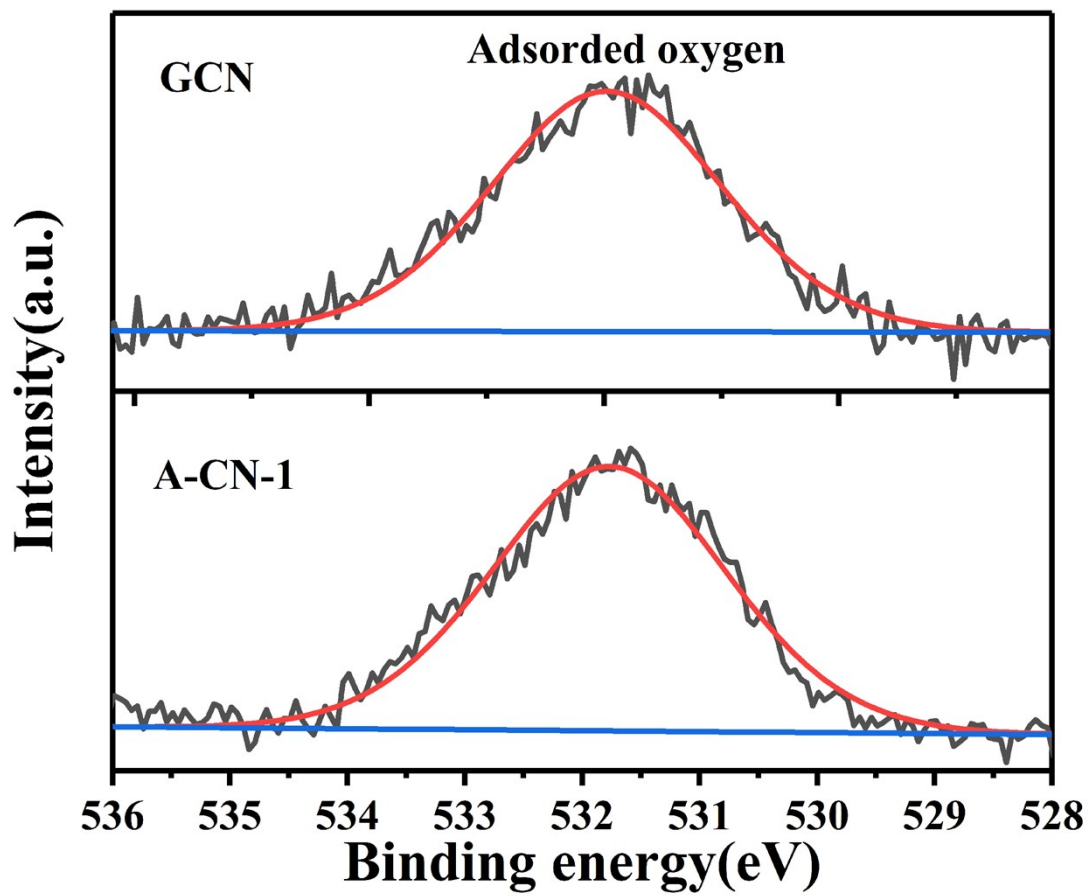

Figure S9. O 1s XPS spectra of GCN and A-CN-1.

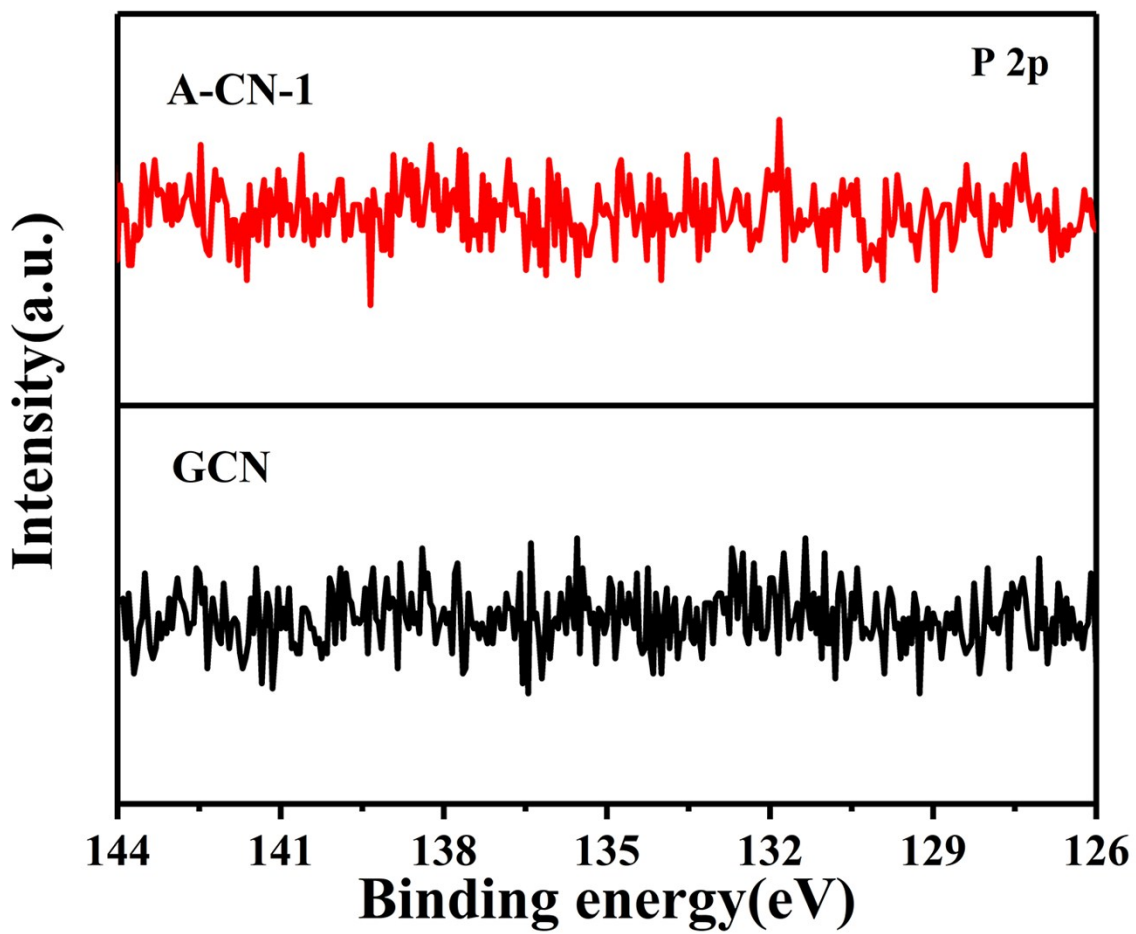

Figure S10. P 2p XPS spectra of GCN and A-CN-1.

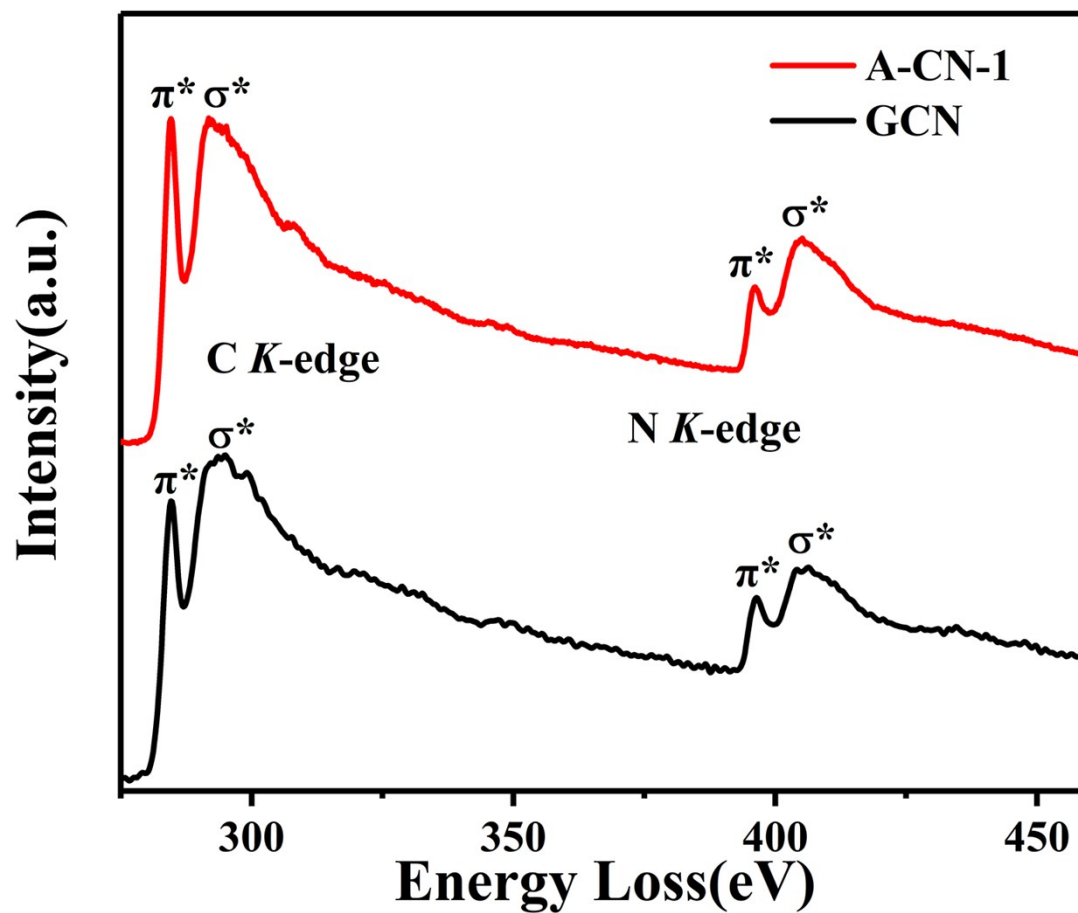

Figure S11. EEL spectrum of GCN and A-CN-1.

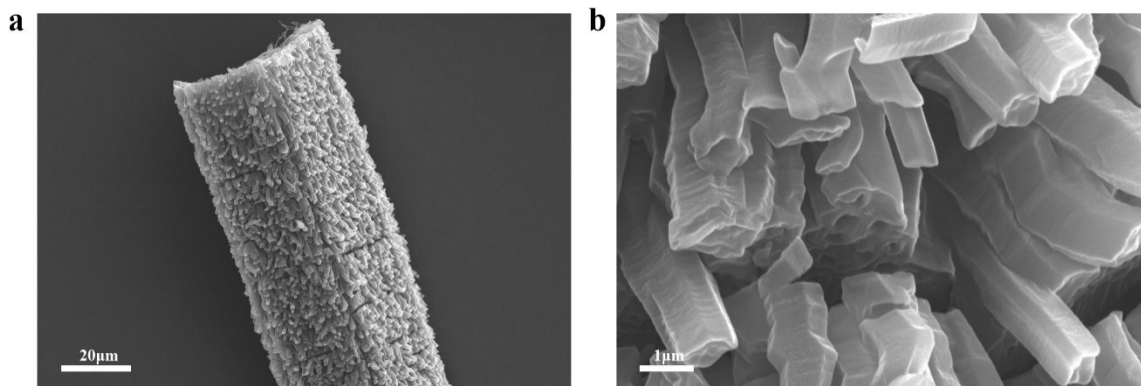

**Figure S12.** SEM images (a, b) of A-CN-1 after photocatalytic hydrogen production process.

**Table S3.** Kinetic analysis of emission decay for GCN and A-CN-1.

| <b>Sample</b> | <b><math>\tau_1</math>(ns)</b> | <b>Rel.%</b> | <b><math>\tau_2</math>(ns)</b> | <b>Rel.%</b> | <b><math>\tau_3</math>(ns)</b> | <b>Rel.%</b> |
|---------------|--------------------------------|--------------|--------------------------------|--------------|--------------------------------|--------------|
| GCN           | 1.47                           | 31.62        | 5.76                           | 47.68        | 32.75                          | 20.70        |
| A-CN-1        | 1.10                           | 29.99        | 5.01                           | 46.17        | 27.88                          | 23.84        |



**Table S4.** Summary of C<sub>3</sub>N<sub>4</sub>-base nanostructures photocatalysts reported for hydrogen evolution rate.

| Catalyst                                                 | Hydrogen evolution rate (μmol/h) | Hydrogen evolution rate (μmol/h/g) | Experimental conditions                             | Light source filter (nm) | BET(m <sup>2</sup> g <sup>-1</sup> ) | Reference |
|----------------------------------------------------------|----------------------------------|------------------------------------|-----------------------------------------------------|--------------------------|--------------------------------------|-----------|
| A-CN-1                                                   | 71 (10mg)                        | 7100                               | 1wt% Pt<br>20% methanol                             | AM 1.5                   | 71                                   | This work |
| g-C <sub>3</sub> N <sub>4</sub> /KNbO <sub>3</sub> (1:1) | 101.9 (100mg)                    | 1019.38                            | 2 wt% Pt<br>20%TEOA                                 | AM 1.5                   | --                                   | 1         |
| UCN                                                      | 47.2 (80mg)                      | 590                                | 3 wt% Pt 10% TEOA                                   | AM 1.5                   | 69.6                                 | 2         |
| KSCN-treated Melon                                       | 24.7 (20mg)                      | 1235                               | 8 wt% Pt<br>20% methanol                            | AM 1.5                   | 55                                   | 3         |
| Urea-CN <sub>x</sub>                                     | 56.2 (20mg)                      | 2810                               | 2 wt% Pt<br>10% methanol                            | AM 1.5                   | 64.6                                 | 4         |
| C <sub>3</sub> N <sub>4</sub> -Ni-Tu-TETN                | 51 (100mg)                       | 510                                | 0.05 mmol Ni <sup>2+</sup><br>3 mmol Tu<br>22% TEOA | AM 1.5                   | --                                   | 5         |
| CNHS                                                     | 57.4 (20mg)                      | 2860                               | 3 wt% Pt<br>10% TEOA                                | >400                     | 277.89                               | 6         |
| PCN-S                                                    | 79.8 (50mg)                      | 1596                               | 1 wt% Pt<br>20% TEOA                                | >400                     | 122.6                                | 7         |
| P-TCN                                                    | 67 (100mg)                       | 670                                | 1wt% Pt<br>20% methanol                             | >420                     | 22.9                                 | 8         |
| R-CN-350                                                 | 19 (10mg)                        | 1900                               | 3wt% Pt<br>10% TEOA                                 | >420                     | 29.9                                 | 9         |
| CN-NaK                                                   | 278 (50mg)                       | 5560                               | 3wt% Pt<br>10% TEOA                                 | >420                     | 74                                   | 10        |

**Reference:**

1. D. Xu, L. Li, T. Xia, W. Fan, F. Wang, H. Bai and W. Shi, *Int. J. Hydrogen. Energy*, 2018, **43**, 16566-16572.
2. Y. Zhang, J. Liu, G. Wu and W. Chen, *Nanoscale*, 2012, **4**, 5300-5303.
3. V. W. Lau, I. Moudrakovski, T. Botari, S. Weinberger, M. B. Mesch, V. Duppel, J. Senker, V. Blum and B. V. Lotsch, *Nature commun.*, 2016, **7**, 12165.
4. V. W.-h. Lau, V. W.-z. Yu, F. Ehrat, T. Botari, I. Moudrakovski, T. Simon, V. Duppel, E. Medina, J. K. Stolarczyk, J. Feldmann, V. Blum and B. V. Lotsch, *Adv. Energy Mater.*, 2017, **7**, 1602251.

5. D. Wang, Y. Zhang and W. Chen, *Chem. Commun.*, 2014, **50**, 1754-1756.
6. Y. Li, R. Jin, Y. Xing, J. Li, S. Song, X. Liu, M. Li and R. Jin, *Adv. Energy Mater.*, 2016, **6**, 1601273.
7. J. Ran, T. Y. Ma, G. Gao, X.-W. Du and S. Z. Qiao, *Energy Environ. Sci.*, 2015, **8**, 3708-3717.
8. S. Guo, Z. Deng, M. Li, B. Jiang, C. Tian, Q. Pan and H. Fu, *Angew. Chem. Int. Ed.*, 2016, **55**, 1830-1834.
9. L. Cui, J. Song, A. F. McGuire, S. Kang, X. Fang, J. Wang, C. Yin, X. Li, Y. Wang and B. Cui, *ACS nano*, 2018, **12**, 5551-5558.
10. G. Zhang, L. Lin, G. Li, Y. Zhang, A. Savateev, S. Zafeiratos, X. Wang and M. Antonietti, *Angew. Chem. Int. Ed.*, 2018, **57**, 9372-9376.
